# Supplementary material
Source: Springer Nature journal article supplement (https://www.springermedizin.de/resource/supplementary/12985_2010_1017_MOESM5_ESM.pdf/9608956)
Supplement: MOESM5 [file 9608956]

680                      690                      700  
 CTTAAAGACCCCCCACTTAACCCT**TAA**XXXXXX Majority

|     |       |      |       |         |     |
|-----|-------|------|-------|---------|-----|
| 676 | ..... | 1039 | ..... | TGAATAA | YJ  |
| 676 | ..... |      |       | A. GTGA | AH  |
| 676 | ..... |      |       | A. GTGA | MDJ |
| 676 | ..... |      |       | A. GTGA | BDH |
| 676 | ..... |      |       |         | AS  |
| 676 | ..... |      |       |         | BY  |
| 676 | ..... |      |       |         | CF  |
| 676 | ..... |      |       |         | HL  |
| 676 | ..... |      |       |         | HN  |
| 676 | ..... |      |       |         | JF  |
| 676 | ..... |      |       |         | JMS |
| 676 | ..... |      |       |         | JS  |
| 676 | ..... |      |       |         | MZL |
| 676 | ..... |      |       |         | QTH |
| 676 | ..... | C.   | A.    |         | SH  |
| 676 | ..... |      |       |         | SY  |
| 676 | ..... |      |       |         | WF  |
| 676 | ..... |      |       | A. C.   | CL  |
| 676 | ..... |      |       | A. C.   | LG  |
